# Supplementary material for: Integrated small RNA and mRNA expression profiles reveal miRNAs and their target genes in response to Aspergillus flavus growth in peanut seeds
Source: PubMed Central journal article supplement (PMC7222326; doi:10.1186/s12870-020-02426-z), 2020-05-13
Supplement: 12870_2020_2426_MOESM3_ESM.pdf [file 12870_2020_2426_MOESM3_ESM.pdf]

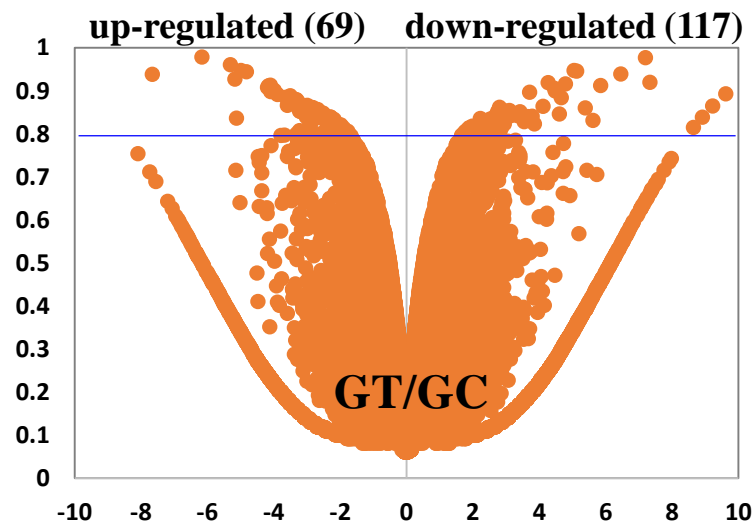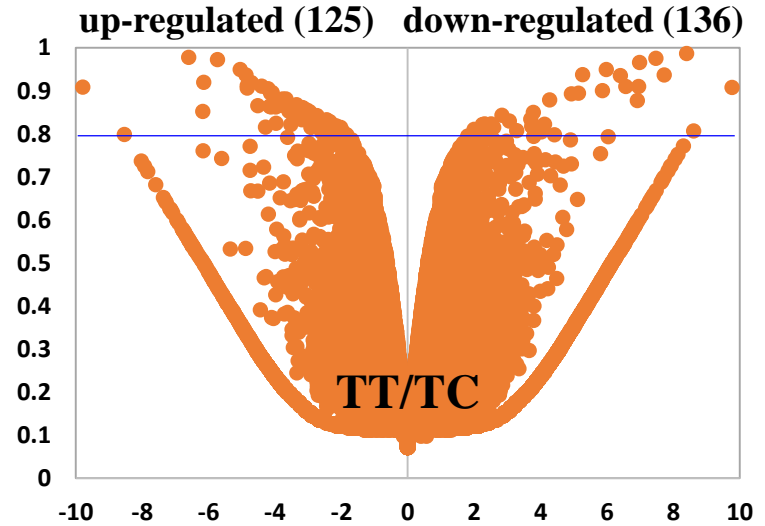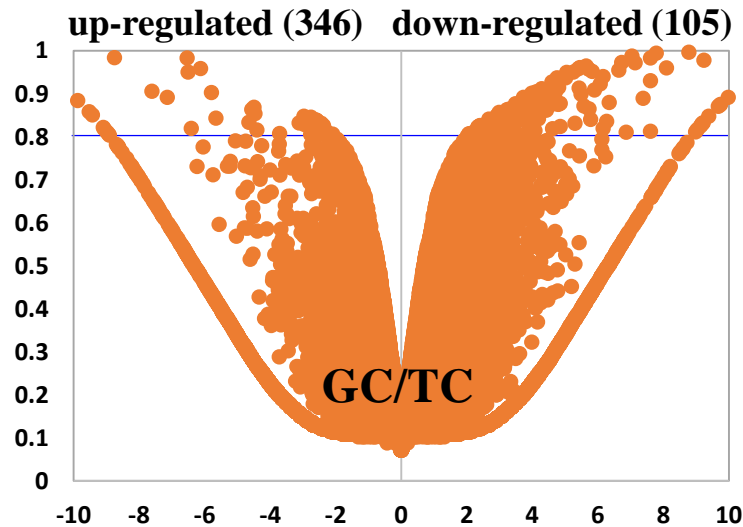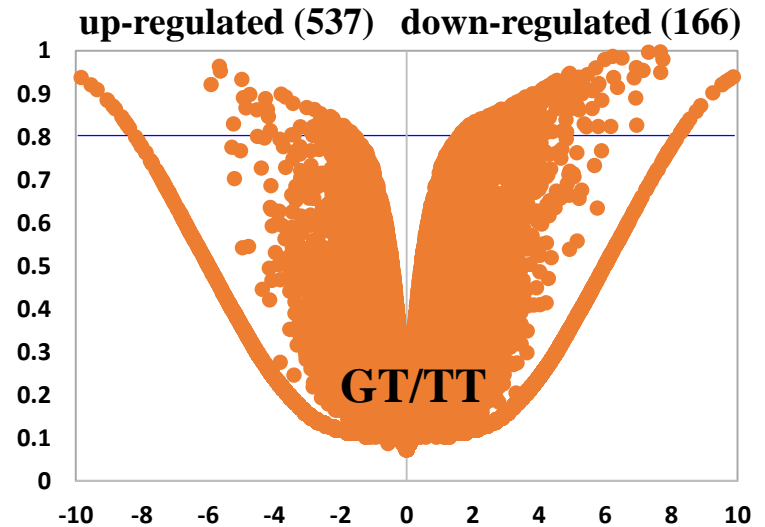

**Figure S3. Volcano plots showing the gene expression differences among different samples.** The RPKM-normalized transcript count data sets were analysed by using the NOIseq: the x-axis shows the log-ratio (gene expression fold change after challenge) the y-axis the probability for each gene of being differentially expressed. The up-regulated and down-regulated genes were identified under the criterion of  $\text{probability} \geq 0.8$  and  $|\log_2(\text{fold change})| \geq 1$
